# Supplementary material
Source: PubMed Central journal article supplement (PMC1716209)
Supplement: JCI0729415sd.pdf [file JCI0729415sd.pdf]

Supplementary Figure 1

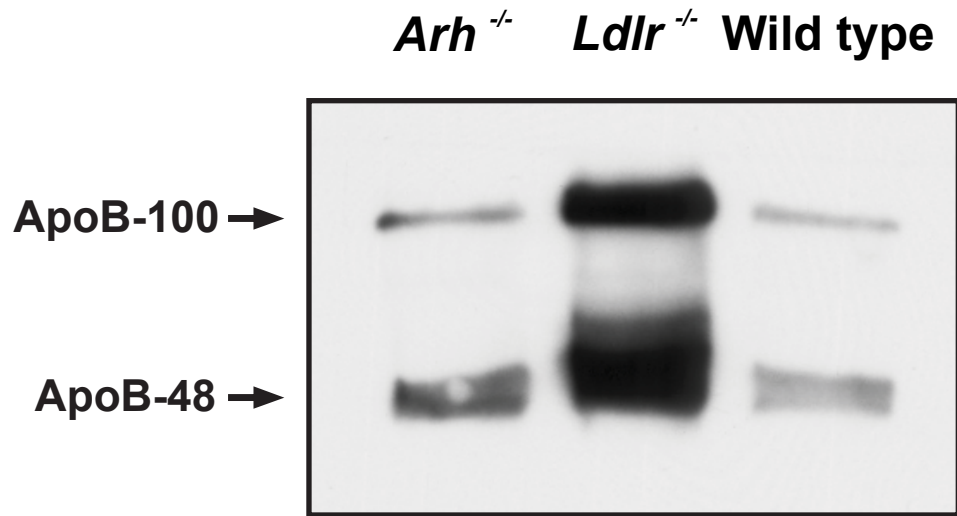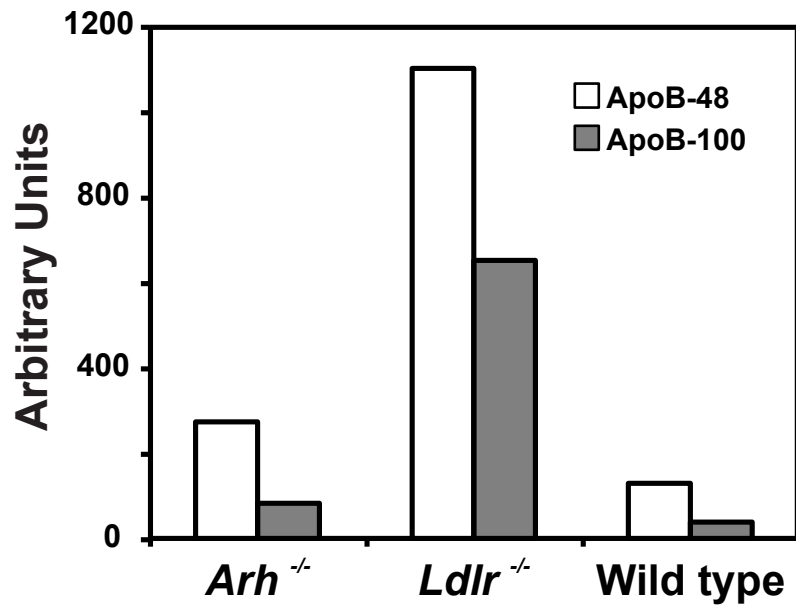

Supplementary Figure 2

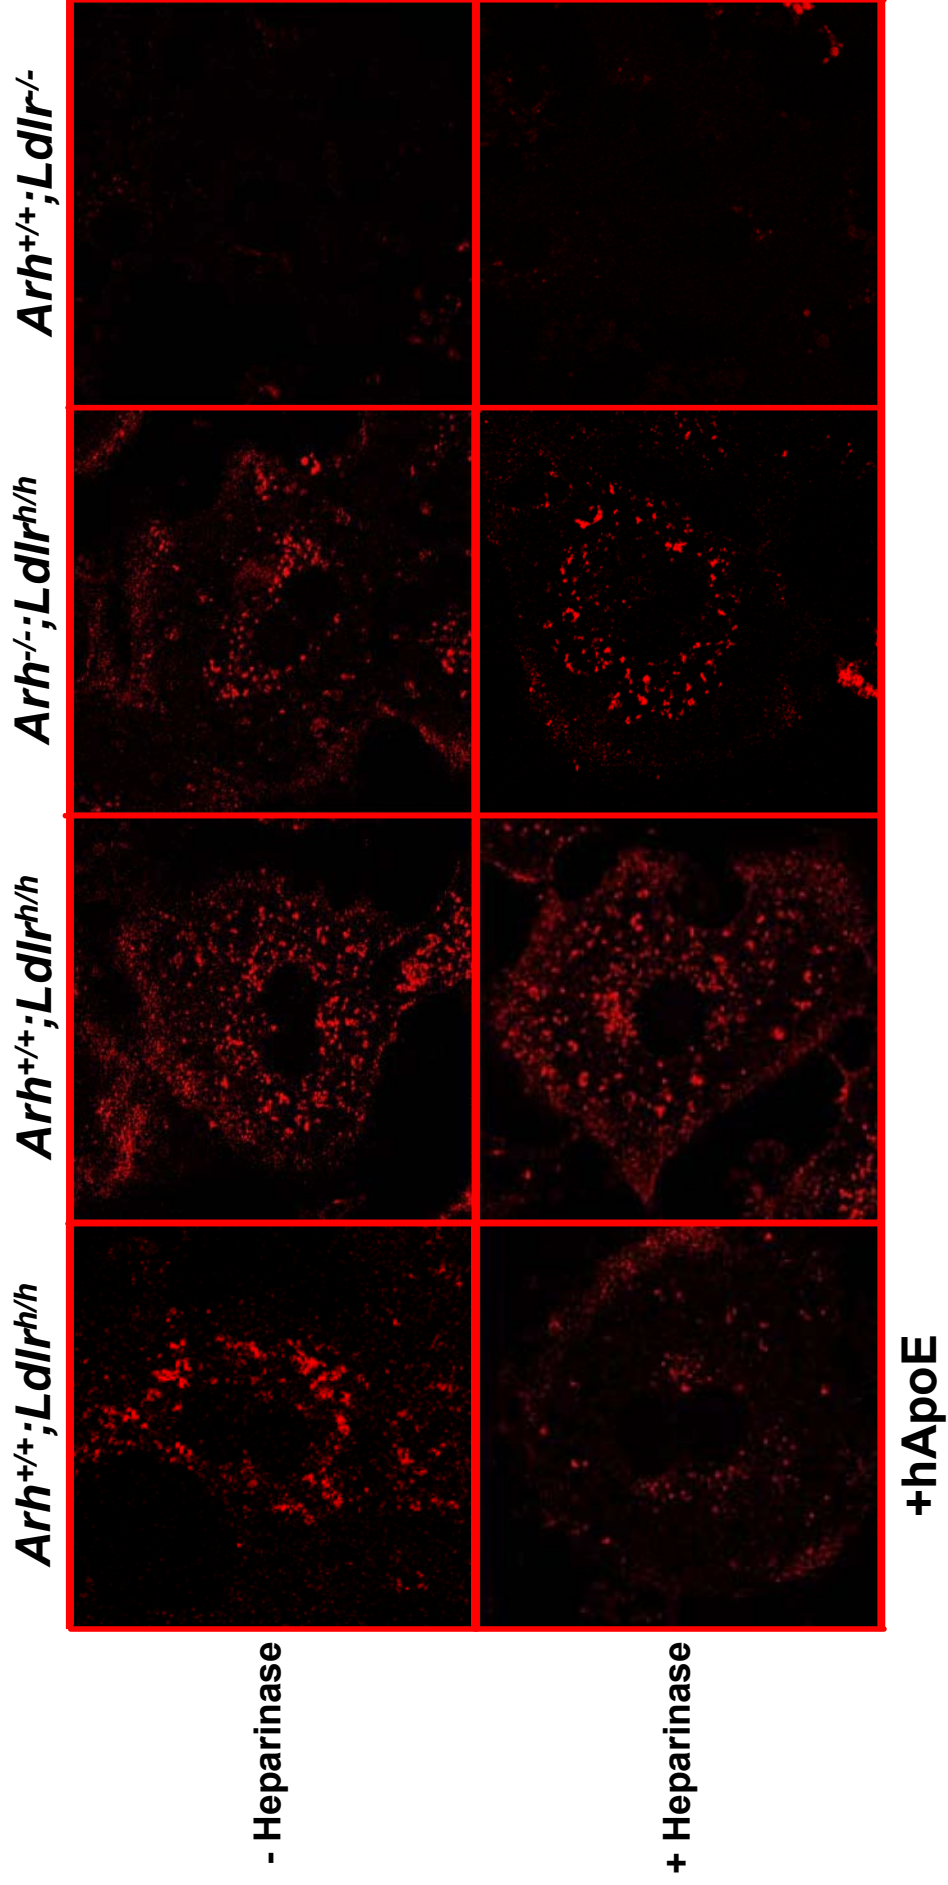

### Supplementary Figure 1

Plasma apo-B48 and apo-B100 in *Arh*<sup>-/-</sup>, *Ldlr*<sup>-/-</sup>, and wild type mice.

Chow-fed male *Arh*<sup>-/-</sup>, *Ldlr*<sup>-/-</sup>, and wild type mice (n=4) aged 18-22 weeks were fasted for six hours prior to collection of blood via retro-orbital puncture. Plasma samples were pooled, and the proteins were precipitated with trichloroacetic acid. The resulting pellet was washed with ice-cold acetone and subjected to 5% SDS PAGE. Apo-B was detected by western blotting. Scanning densitometry was used to determine the relative amounts of apo-B48 and apo-B100 in each sample.

### Supplementary Figure 2

Heparin sulfate proteoglycans are not required for VLDL internalization in the absence of ARH. Primary hepatocytes were isolated from *Arh*<sup>+/+</sup>;*Ldlr*<sup>h/h</sup>, *Arh*<sup>-/-</sup>;*Ldlr*<sup>h/h</sup>, and *Ldlr*<sup>-/-</sup> mice and incubated overnight in DMEM containing 5% lipoprotein-deficient serum. The following morning the hepatocytes were incubated at 37°C for 1 h with fresh DMEM medium containing 5% HLPPS with or without 5 unit/ml heparinase. DiI-labeled  $\beta$ -VLDL (10  $\mu$ g/ml) was added to the cells and incubated at 37°C for 2 hours. The cells were then washed with cold PBS-T and processed for microscopy as described in the Methods. Apo-E-enriched  $\beta$ -VLDL were used as a positive control for heparinase activity.
